# Supplementary material for: Stability, Morphology, and Effects of In Vitro Digestion on the Antioxidant Properties of Polyphenol Inclusion Complexes with β-Cyclodextrin
Source: MDPI journal article supplement (doi:10.3390/molecules27123808), 2022-06-14
Supplement: s1 [file s1]

## Supplementary material

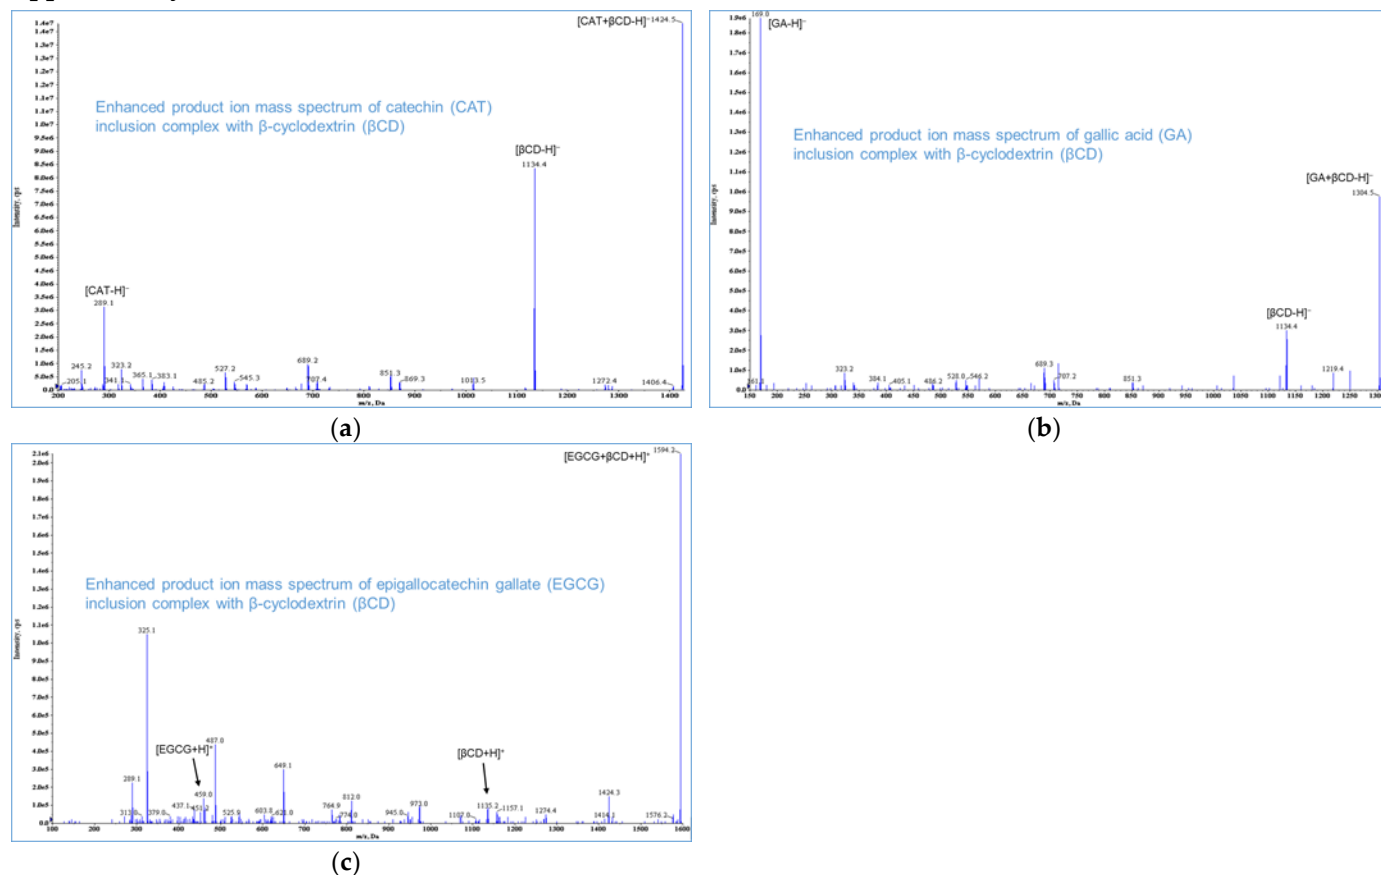

**Figure S1.** Enhanced product ions scan mass spectrum of  $\beta$ CD inclusion complexes with (a) CAT, (b) GA and (c) EGCG.  $\beta$ CD – beta cyclodextrin, CAT – catechin, GA – gallic acid, EGCG – epigallocatechin gallate.

**Table S1.** Polyphenol-polyphenol interactions on antioxidant activity (ORAC assay ( $\mu\text{M TE}$ )).

|                         | CAT/GA            | CAT/EGCG           | GA/EGCG            | CAT/GA/EGCG        |
|-------------------------|-------------------|--------------------|--------------------|--------------------|
| <b>Non-encapsulated</b> |                   |                    |                    |                    |
| Expected                | $23.53 \pm 1.234$ | $31.97 \pm 2.06$   | $29.41 \pm 1.56$   | $42.46 \pm 2.36$   |
| Observed                | $22.25 \pm 0.36$  | $20.44 \pm 1.03^*$ | $23.14 \pm 0.30^*$ | $23.35 \pm 1.14^*$ |
| p value                 | 0.14              | < 0.001            | < 0.001            | < 0.001            |
| Interaction             | Additive          | Antagonistic       | Antagonistic       | Antagonistic       |
| <b>Encapsulated</b>     |                   |                    |                    |                    |
| Expected                | $24.11 \pm 1.11$  | $33.52 \pm 1.38$   | $30.58 \pm 1.56$   | $30.58 \pm 1.56$   |
| Observed                | $22.56 \pm 0.40$  | $21.87 \pm 0.99^*$ | $22.54 \pm 0.39^*$ | $24.03 \pm 1.01^*$ |
| p value                 | 0.07              | < 0.001            | < 0.001            | < 0.001            |
| Interaction             | Additive          | Antagonistic       | Antagonistic       | Antagonistic       |

CAT – catechin, GA – gallic acid, EGCG – epigallocatechin gallate,  $\mu\text{M TE}$  – micromolar Trolox equivalents. The \* denotes significant ( $p < 0.05$ ) difference between the expected and observed values in the same column for non-encapsulated and encapsulated samples. The data is represented as mean  $\pm$  SEM of at least five experiments done in duplicates.

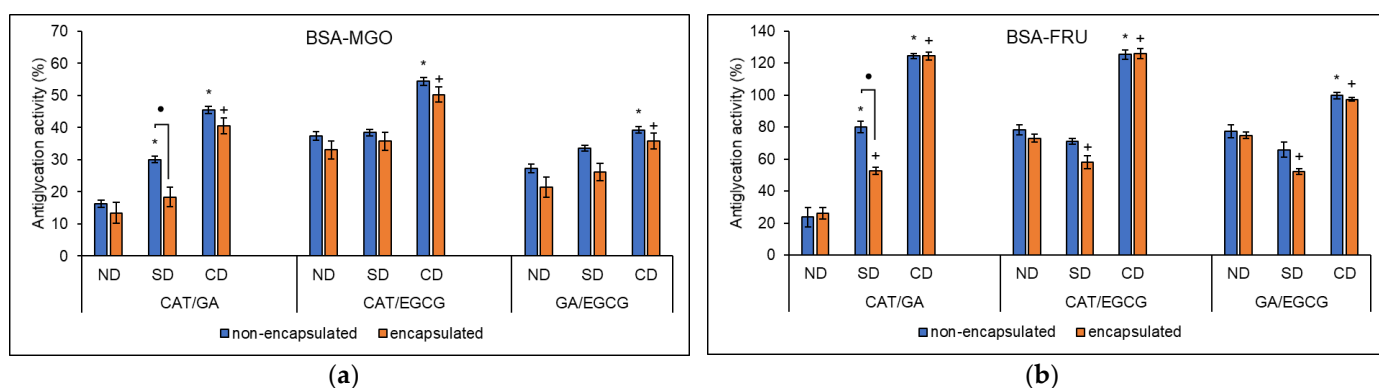

**Figure S2.** Inhibition of AGEs formation by non-digested (ND), and following simple (SD) and com-plex (CD) digestion of non- and encapsulated CAT/GA, CAT/EGCG, and GA/EGCG combinations evaluated with the (a) BSA-MGO and (b) BSA-FRU models at 100  $\mu$ M for each polyphenol in each sample. The data is represented as mean  $\pm$  SEM of at least five experiments done in duplicates. ND – non-digested, SD – simple digestion, CD – complex digestion, AGEs – advanced glycation end-products, BSA – bovine serum albumin, MGO – methylglyoxal, FRU – fructose, CAT – catechin, GA – gallic acid, EGCG – epigallocatechin gallate. The \* and + represent significant ( $p < 0.05$ ) differences between non- and encapsulated ND compared with respective SD or CD samples. The • denotes significant ( $p < 0.05$ ) difference between the non- and encapsulated for each treatment.

**Table S2.** Polyphenol-polyphenol interactions on antiglycation activity (AGEs assay (%)).

| BSA-MGO                 | CAT/GA            | CAT/EGCG          | GA/EGCG           | CAT/GA/EGCG       |
|-------------------------|-------------------|-------------------|-------------------|-------------------|
| <b>Non-encapsulated</b> |                   |                   |                   |                   |
| Expected                | 16.64 $\pm$ 2.55  | 44.85 $\pm$ 2.65  | 23.59 $\pm$ 2.42  | 42.54 $\pm$ 3.75  |
| Observed                | 16.26 $\pm$ 1.21  | 37.36 $\pm$ 1.28* | 27.31 $\pm$ 1.29* | 38.02 $\pm$ 1.30* |
| p value                 | 0.71              | < 0.001           | 0.01              | 0.04              |
| Interaction             | Additive          | Antagonistic      | Synergistic       | Antagonistic      |
| <b>Encapsulated</b>     |                   |                   |                   |                   |
| Expected                | 8.28 $\pm$ 7.27   | 34.20 $\pm$ 7.11  | 17.47 $\pm$ 7.22  | 29.98 $\pm$ 10.78 |
| Observed                | 13.42 $\pm$ 3.34  | 33.06 $\pm$ 2.85  | 21.39 $\pm$ 3.18  | 33.63 $\pm$ 2.75  |
| p value                 | 0.10              | 0.72              | 0.21              | 0.54              |
| Interaction             | Additive          | Additive          | Additive          | Additive          |
| BSA-FRU                 | CAT/GA            | CAT/EGCG          | GA/EGCG           | CAT/GA/EGCG       |
| <b>Non-encapsulated</b> |                   |                   |                   |                   |
| Expected                | 41.64 $\pm$ 11.12 | $\geq 100.00$     | 88.17 $\pm$ 9.65  | $\geq 100.00$     |
| Observed                | 23.77 $\pm$ 6.15* | 78.15 $\pm$ 3.09* | 77.39 $\pm$ 3.96* | 80.84 $\pm$ 4.73* |
| p value                 | 0.001             | < 0.001           | 0.03              | < 0.001           |
| Interaction             | Antagonistic      | Antagonistic      | Antagonistic      | Antagonistic      |
| <b>Encapsulated</b>     |                   |                   |                   |                   |
| Expected                | 48.34 $\pm$ 5.64  | $\geq 100.00$     | 89.78 $\pm$ 4.11  | $\geq 100.00$     |
| Observed                | 26.30 $\pm$ 3.63* | 73.05 $\pm$ 2.49* | 74.88 $\pm$ 2.16* | 75.42 $\pm$ 1.57* |
| p value                 | < 0.001           | < 0.001           | < 0.001           | < 0.001           |
| Interaction             | Antagonistic      | Antagonistic      | Antagonistic      | Antagonistic      |

CAT – catechin, GA – gallic acid, EGCG – epigallocatechin gallate, AGEs -advanced glycation end-products, BSA – bovine serum albumin, MGO – methylglyoxal, FRU – fructose. The \* denotes significant ( $p < 0.05$ ) difference between the expected and observed values in the same column for non-encapsulated and encapsulated samples. The data is represented as mean  $\pm$  SEM of at least five experiments done in duplicates.

**Table S3.** Polyphenol-polyphenol interactions on cellular activity (DCFH-DA assay antioxidant (%)).

| [10 $\mu$ M]            | CAT/GA <sup>+</sup> | CAT/EGCG          | GA/EGCG           | CAT/GA <sup>+</sup> /EGCG |
|-------------------------|---------------------|-------------------|-------------------|---------------------------|
| <b>Non-encapsulated</b> |                     |                   |                   |                           |
| <b>Expected</b>         | 30.68 $\pm$ 11.13   | 58.63 $\pm$ 16.53 | 27.94 $\pm$ 8.25  | 58.63 $\pm$ 16.53         |
| <b>Observed</b>         | 36.73 $\pm$ 8.22    | 69.51 $\pm$ 4.44  | 73.03 $\pm$ 2.81* | 75.60 $\pm$ 3.69          |
| <b>p value</b>          | 0.39                | 0.26              | < 0.001           | 0.09                      |
| <b>Interaction</b>      | Additive            | Additive          | Synergistic       | Additive                  |
| <b>Encapsulated</b>     |                     |                   |                   |                           |
| <b>Expected</b>         | 21.15 $\pm$ 11.78   | 44.46 $\pm$ 21.31 | 23.30 $\pm$ 12.13 | 44.46 $\pm$ 21.31         |
| <b>Observed</b>         | 43.15 $\pm$ 7.45*   | 68.73 $\pm$ 5.45  | 67.97 $\pm$ 6.22* | 80.20 $\pm$ 3.30*         |
| <b>p value</b>          | 0.001               | 0.07              | < 0.001           | 0.02                      |
| <b>Interaction</b>      | Synergistic         | Additive          | Synergistic       | Synergistic               |
| [100 $\mu$ M]           | CAT/GA              | CAT/EGCG          | GA/EGCG           | CAT/GA/EGCG               |
| <b>Non-encapsulated</b> |                     |                   |                   |                           |
| <b>Expected</b>         | $\geq$ 100.00       | $\geq$ 100.00     | $\geq$ 100.00     | $\geq$ 100.00             |
| <b>Observed</b>         | 93.34 $\pm$ 0.78    | 98.46 $\pm$ 0.62  | 101.62 $\pm$ 0.88 | 99.10 $\pm$ 0.49          |
| <b>Interaction</b>      | Additive            | Additive          | Additive          | Additive                  |
| <b>Encapsulated</b>     |                     |                   |                   |                           |
| <b>Expected</b>         | $\geq$ 100.00       | $\geq$ 100.00     | $\geq$ 100.00     | $\geq$ 100.00             |
| <b>Observed</b>         | 95.75 $\pm$ 1.39    | 98.91 $\pm$ 0.71  | 102.14 $\pm$ 0.68 | 100.58 $\pm$ 0.57         |
| <b>Interaction</b>      | Additive            | Additive          | Additive          | Additive                  |

CAT – catechin, GA – gallic acid, EGCG – epigallocatechin gallate. The \* denotes significant ( $p < 0.05$ ) difference between the expected and observed values in the same column for non-encapsulated and encapsulated samples. +Gallic acid had no quantifiable activity.
